# Supplementary material for: SNTA1-deficient human cardiomyocytes show shorter field potential duration and slower conduction velocity
Source: Research Square preprint supplement (doi:10.21203/rs.3.rs-6120127/v1), 2025-03-11
Supplement: Supplementary file 1 [file 81dc8d4351a089057f92244f.docx]

Table S1. Primer sequences used for q-PCR

| Gene | Forward 5’-3’ | Reverse 5’-3’ |
| --- | --- | --- |
| DPPA4 | GCAAAAGGCAAGGAGGAACATC | CTGGGGTTGTCAGTGTGCTC |
| SOX-2 | AACCAGCGCATGGACAGTTA | CGAGCTGGTCATGGAGTTGT |
| OCT-4 | CTCGAGAAGGATGTGGTCCG | AGCCTGGGGTACCAAAATGG |
| NANOG | AATGGTGTGACGCAGGGATG | TGCACCAGGTCTGAGTGTTC |
| SCN5A | CTGACCTCACCATCACTATGTG | GCTGTGAAAATCCCTGTGAAG |
| GAPDH | GGAGCGAGATCCCTCCAAAAT | GGCTGTTGTCATACTTCTCATGG |

Table S2. Primary and Secondary Antibodies

| Type | Antibody | Application | Dilution | Species | Manufacture  And Catalog  Number |
| --- | --- | --- | --- | --- | --- |
| Primary | Anti-OCT4 | Immunofluorescence | 1:100 | mouse monoclonal | Santa Cruz  sc-5279 |
| Anti-SSEA4 | Immunofluorescence | 1:100 | Mouse  Monoclonal | Santa Cruz  sc-21704 |
| Anti-cTnT | Immunofluorescence; Flow cytometry | 1:100 | Mouse  Monoclonal | Abcam  Ab8295 |
| Anti-MYL2 | Immunofluorescence; Flow cytometry; | 1:100; 1:100; | Rabbit  Polyclonal | Proteintech  10906-1-AP |
| Anti-α-actinin | Immunofluorescence | 1:100 | Rabbit  Polyclonal | Abcam  Ab137346 |
| Secondary | Goat anti-Mouse IgG Alexa Fluor  594 | Immunofluorescence | 1:200 | Goat anti-  Mouse IgG | Invitrogen  A21145 |
| Goat anti-Rabbit IgG Alexa Fluor  488 | Immunofluorescence | 1:200 | Goat anti-  Rabbit IgG | Invitrogen  A32731 |
| Chicken anti-Rabbit IgG Alexa  Fluor 594 | Immunofluorescence | 1:200 | Chicken anti-  Rabbit IgG | Invitrogen  A21442 |
| Chicken anti-Mouse IgG Alexa  Fluor 488 | Immunofluorescence | 1:200 | Chicken anti-  Mouse IgG | Invitrogen  A21200 |
